1 **Viral diversity is an obligate consideration in CRISPR/Cas9 designs**  
2 **for HIV cure**

3

4

5 Pavitra Roychoudhury<sup>1</sup>, Harshana De Silva Feelixge<sup>2</sup>, Daniel Reeves<sup>2</sup>, Bryan T. Mayer<sup>2</sup>, Daniel  
6 Stone<sup>2</sup>, Joshua T. Schiffer<sup>2,3,4</sup>, Keith R. Jerome<sup>1,2\*</sup>

7

8

9

10 <sup>1</sup> Department of Laboratory Medicine, University of Washington

11 <sup>2</sup> Vaccine and Infectious Disease Division, Fred Hutchinson Cancer Research Center

12 <sup>3</sup> Clinical Research Division, Fred Hutchinson Cancer Research Center

13 <sup>4</sup> Department of Medicine, University of Washington

14 \* Corresponding author

15 Email: [kjerome@fredhutch.org](mailto:kjerome@fredhutch.org) (KRJ)

16

## 17 **Abstract**

18 RNA-guided CRISPR/Cas9 systems can be designed to mutate or excise the integrated HIV  
19 genome from latently infected cells and have therefore been proposed as a curative approach  
20 for HIV. However, most studies to date have focused on molecular clones with ideal target site  
21 recognition and do not account for target site variability observed within and between patients.  
22 For clinical success and broad applicability, guide RNA (gRNA) selection must account for  
23 circulating strain diversity and incorporate the within-host diversity of HIV. To address this, we  
24 identified a set of gRNAs targeting HIV LTR, *gag* and *pol* using publicly available sequences for  
25 these genes. We ranked gRNAs according to global conservation across HIV-1 group M and  
26 within subtypes A-C. By considering paired and triplet combinations of gRNAs, we found triplet  
27 sets of target sites such that at least one of the gRNAs in the set was present in over 98% of all  
28 globally-available sequences. We then selected 59 gRNAs from our list of highly-conserved LTR  
29 target sites and evaluated *in vitro* activity using a loss-of-function LTR-GFP fusion reporter. We  
30 achieved efficient GFP knockdown with multiple gRNAs and found clustering of highly active  
31 gRNA target sites near the middle of the LTR. Using published deep-sequence data from HIV-  
32 infected patients, we found that globally conserved sites also had greater within-host target  
33 conservation. Lastly, we developed a mathematical model based on varying distributions of  
34 within-host HIV sequence diversity and enzyme efficacy. We used the model to estimate the  
35 number of doses required to deplete the latent reservoir and achieve functional cure thresholds.  
36 Our modeling results highlight the importance of within-host target site conservation. While  
37 increased doses may overcome low target cleavage efficiency, inadequate targeting of rare  
38 strains is predicted to lead to rebound upon ART cessation even with many doses.

39

40

## 41 **Author summary**

42 The field of genome engineering has exploded over the last decade with the discovery of  
43 targeted endonucleases such as CRISPR/Cas9. Endonucleases are now being used to develop  
44 a wide range of therapeutics and their use has expanded into antiviral therapy against latent  
45 viral infections like HIV. The idea is to induce mutations in latent viral genomes that will render  
46 them replication-incompetent, thereby producing a functional cure. Although a great deal of  
47 progress has been made, most studies to date have relied on molecular clones that represent  
48 “ideal” targets. For clinical success and broad applicability, these therapies need to account for  
49 viral genetic diversity within and between individuals. Our paper examines the impact of HIV  
50 diversity on CRISPR-based cure strategies to determine the predictors of future clinical  
51 success. We performed an exhaustive and detailed computational analysis to identify optimal  
52 CRISPR target sites, taking into consideration both within-host and global viral diversity. We  
53 coupled this with laboratory testing of highly-conserved guides and compared measured activity  
54 to predicted results. Finally, we developed a mathematical model to predict the impact of  
55 enzyme activity and viral diversity on the number of doses of a CRISPR-based therapy needed  
56 to achieve a functional cure of HIV.

57

## 58 **Introduction**

59 Despite the success of combination antiretroviral therapy (cART) in suppressing HIV viremia,  
60 reservoirs of latently-infected cells remain the major barrier for HIV cure [1]. The HIV latent  
61 reservoir is composed of long-lived infected cells harboring replication-competent proviruses  
62 with limited transcription that can reactivate and reseed the reservoir upon cART interruption  
63 [2,3]. A promising therapeutic strategy for achieving cure involves depleting the reservoir by  
64 direct disruption of proviral genomes using engineered DNA-editing enzymes such as  
65 CRISPR/Cas9 nucleases. A growing body of research shows that endonuclease-induced  
66 mutation of essential viral genes or excision of provirus can render the virus unable to replicate  
67 [4–12]. If performed on a large scale, this approach could yield pharmacologically significant  
68 reservoir reduction. However, viral reservoirs are highly diverse, even in well-suppressed  
69 individuals [13,14], and this diversity remains a major challenge for the application of genome  
70 editing strategies towards an HIV cure. Effective targeting of all viral genetic variants within an  
71 infected individual will be crucial for achieving sufficient reservoir reduction to prevent viral  
72 rebound upon cART cessation [15,16] and preventing the emergence of resistance to this  
73 therapy [11].

74 Thus far, studies used to demonstrate the viability of gene editing strategies against HIV  
75 have primarily targeted single molecular clones that provide ideal endonuclease target site  
76 recognition [7,8]. Multiple classes of gene-editing enzymes have been studied, but the  
77 CRISPR/Cas9 system has gained popularity in recent years due to its effectiveness, relative  
78 simplicity, and ease of use. Several computational tools now exist to identify CRISPR target  
79 sites, to predict the activity of guide RNAs (gRNAs) targeting those sites, and to identify and  
80 score gRNAs based on multiple factors including predicted off-target activity [17–19]. However,  
81 no available tools allow guide selection based on predicted target site conservation or predicted  
82 clinical efficacy based on viral diversity. The identification and characterization of the most

83 conserved target sites on a group- or subtype-specific basis will allow rapid selection of gRNAs  
84 when deep sequencing of a patient's reservoir is not practical or feasible. Furthermore, because  
85 the virus can evolve resistance to endonuclease targeting [11], multiple sites may need to be  
86 targeted concurrently in order to prevent the emergence of resistance. Therefore, the selection  
87 of multiplexed sets of gRNAs must account for the diversity of circulating strains across a wide  
88 range of infected people, and dosing strategies must consider within-host diversity of HIV to  
89 maximize the probability of a functional cure.

90 Here we present a CRISPR gRNA design strategy that selects target sites not only by  
91 predicted efficacy and specificity but also by prevalence in the population. We first created a  
92 database of highly conserved target sites in HIV LTR, *gag*, and *pol* focusing on group- and  
93 subtype-level conservation using information about the global sequence diversity of HIV. We  
94 used this database to identify highly-conserved target site pairs and triplets to create multiplex  
95 gRNA designs predicted to maximize targeting and reduce the probability of treatment  
96 resistance. From this analysis, we identified and tested 59 LTR guides using a fluorescent  
97 reporter to quantify activity *in vitro*. We then used deep-sequence data from HIV-infected  
98 individuals to determine target site conservation and probability of cleavage by individual gRNAs  
99 in our list. Finally, we used a mathematical model to predict the number of doses that would be  
100 required to achieve functional cure thresholds, while accounting for varying levels of target site  
101 diversity and enzyme efficacy.

102

## 103 **Results**

### 104 **Broadly-targeting spCas9 gRNAs against HIV *gag*, *pol*, and LTR**

105 We performed a screen to identify globally conserved target sites for *Streptococcus pyogenes*  
106 (spCas9) in LTR, *gag*, and *pol* using alignments for these regions obtained from the HIV LANL  
107 database. LTR was chosen for its utility in excision of the provirus [20–22], while *gag* and *pol*  
108 were chosen based on their conservation between HIV strains [23]. The publicly-available LANL  
109 alignments contain HIV sequences from thousands of infected persons (from about 1200 for  
110 LTR to more than 8000 for *pol*) and include strain and geographic information. From these  
111 alignments, we computed majority consensus sequences for LTR, *gag*, and *pol* of HIV-1 group  
112 M and subtypes A-C. We identified a total of 246 unique gRNA target sites in LTR, 573 in *gag*,  
113 and 897 in *pol*. For each target site identified, we determined the number of exact hits in the  
114 overall alignment of all group M sequences and for each subtype, and ranked target sites by  
115 overall prevalence (Fig 1). Target sites were found to be most conserved in *pol* (Table 1), where  
116 a single target site was present in up to 86.5% (n = 4416) of all group M sequences. The most-  
117 conserved target sites in LTR and *gag* occurred in up to 70.6% (n = 1216) and 71.1% (n = 8435)  
118 of group M sequences respectively.

119

120 **Fig 1.** Top 100 gRNA target sites in HIV LTR (A), *gag* (B) and *pol* (C) ranked by prevalence  
121 (bottom to top) within an alignment of available sequences within group M for each genomic  
122 region. The x-axis shows the percentage of all sequences in group M that contain an exact  
123 match to the target site. Within each horizontal bar, shading indicates what percentage of  
124 sequences with target sites hits belong to each subtype. Inset bar plots show the total number  
125 of sequences of each subtype in the alignment.

126

127 **Table 1. Maximum targeting possible with 1, 2 or 3 gRNAs**

|            | Subtype A |        |       |         | Subtype B |        |      |         | Subtype C |        |      |         | Group M |        |      |         |
|------------|-----------|--------|-------|---------|-----------|--------|------|---------|-----------|--------|------|---------|---------|--------|------|---------|
|            | n         | single | pair  | triplet | n         | single | pair | triplet | n         | single | pair | triplet | n       | single | pair | triplet |
| <b>LTR</b> | 75        | 90.7   | 100.0 | 100.0   | 284       | 74.3   | 92.6 | 98.6    | 373       | 84.5   | 96.0 | 98.9    | 1216    | 70.6   | 83.0 | 88.8    |
| <b>gag</b> | 404       | 86.4   | 96.3  | 99.5    | 3280      | 80.9   | 95.2 | 98.5    | 1865      | 75.7   | 94.0 | 98.4    | 8453    | 71.1   | 88.2 | 95.5    |
| <b>pol</b> | 150       | 96.0   | 100.0 | 100.0   | 1750      | 88.4   | 98.6 | 99.8    | 878       | 84.6   | 97.6 | 99.9    | 4416    | 86.5   | 96.5 | 99.2    |

128 n = number of sequences in the alignment; remaining columns show % (out of total sequences) that can be targeted  
 129 with single, paired or triplet gRNA combinations

130  
 131

132 We determined predicted on-target cleavage efficiency and off-target activity for each  
 133 guide sequence (Fig 2) using the sgRNA designer tool [17]. Predicted on-target activity scores  
 134 were in the range [0,1] where a score of 1 was associated with successful knockout in the  
 135 experiments of Doench et al. [17,24] and gRNAs with scores < 0.2 were generally excluded  
 136 because they were shown to be predictive of poor activity. Mean predicted activity scores  
 137 across all identified guides were 0.50 (SD 0.12, n = 246) for LTR, 0.49 (SD 0.13, n = 573) for  
 138 *gag* and 0.47 (SD 0.13, n = 897) for *pol*. From the list of gRNAs identified, we excluded 10 from  
 139 *gag* and 26 from *pol* from further analyses due to high predicted off-target activity scores. No  
 140 significant correlation was observed between predicted activity and target site conservation  
 141 (Table S1A).

142

143 **Fig 2.** (A) Histogram of predicted activity of all gRNAs identified in LTR, *gag* and *pol* across all  
 144 four consensus sequences (group M, subtype A-C) for each gene. (B) Predicted activity score  
 145 vs. target site conservation for individual gRNAs grouped by subtype and gene. Red triangles  
 146 indicate gRNAs excluded due to predicted off-target activity. Numbers in blue represent the total  
 147 number of guides with predicted activity score > 0.2 and where target sites occur in more than  
 148 50% of sequences in the group or subtype alignment.

149

150

## 151 **Multiplexed gRNA designs**

152 For each gene, we determined the number of sequences that could be targeted by pairs and  
153 triplets of gRNAs in group M overall, and in each subtype A-C. We determined that just 2  
154 strategically selected gRNAs are sufficient for targeting 100% of LTR and *pol* sequences in the  
155 current global alignment for Subtype A, and 3 gRNAs are able to target over 98% of all  
156 sequences in Subtypes A-C. However, when considering all group M sequences, the maximum  
157 percentage of sequences targeted by triplet sets of gRNAs drops to 88.8% for LTR, 95.5% for  
158 *gag* and 99.2% for *pol* (Table 1). Overall, better coverage of group M, or subtypes A-C  
159 sequences was achieved when pair or triplet gRNAs targeted *pol* suggesting that *pol* is an ideal  
160 therapeutic target for targeted mutagenesis with multiplexed guide RNAs. The two most  
161 conserved LTR sites in the whole of group M (rank 1 and 2) were also the most prevalent target  
162 sites in the individual subtypes, but this was not the case for *gag* and *pol* (Table S2).

163

## 164 **Functional testing of selected gRNAs**

165 From our list of 246 gRNAs targeting LTR, we identified 59 gRNAs for functional testing by first  
166 considering the most conserved target sites in group M and each subtype. We then included  
167 any gRNAs that increase the number of sequences targeted when combined in pairs or triplets  
168 with the previous list (Fig S1A). In order to test the activity of these guides in vitro, we designed  
169 LTR-GFP fusion reporter constructs using consensus sequences for group M and subtypes A-C  
170 (Fig 3A, Fig S1B). We tested the ability of each gRNA to knock down reporter GFP expression  
171 in HEK293 cells following co-transfection with a plasmid expressing spCas9 mCherry containing



172 each HIV-specific gRNA and the LTR-GFP fusion reporter. The activity of each gRNA was  
173 measured in terms of percent knockdown of median GFP fluorescence intensity relative to  
174 negative controls at 24 h post-transfection in Cas9 expressing (mCherry positive, Fig S1C) cells.

175

176 **Fig 3.** (A) LTR-GFP fusion reporter to test gRNAs for activity *in vitro*. (B) Activity was measured  
177 in terms of % knockdown of median GFP fluorescence intensity relative to negative controls. We  
178 found positive but statistically non-significant correlation between computationally predicted  
179 activity scores and measured activity. (C) We achieved reduction of GFP fluorescence intensity  
180 (positive activity) with a majority of gRNA designs and observed clustering of tested target sites  
181 in two areas of the LTR with the most active guides being clustered around the center of the  
182 LTR. With a small number of gRNAs, we observed negative activity (increase in GFP  
183 fluorescence). Lower panel shows residue conservation (in 0-2 bits) across the LTR for  
184 alignments of subtype sequences or all sequences in group M.

185

186 We compared measured gRNA activity to predicted activity scores from the sgRNA  
187 designer (Fig 3B); there was a trend towards weak positive correlation between predicted and  
188 measured activity (Pearson's  $r = 0.25$ ,  $n = 59$ , 95% CI = 0.00–0.48, Table S1B). We observed a  
189 reduction of GFP fluorescence intensity with 52 out of 59 gRNAs (Fig 3C, Table S3), with a  
190 maximum knockdown of 76.3% (mean = 15.3%, SD = 16.0%,  $n = 59$ ). Maximum knockdown  
191 was achieved at target site CAAAGACTGCTGACACAGAAGGG, which was identified in the  
192 consensus sequence of subtype C and found to occur in 23.1% of group M sequences and  
193 68.4% of subtype C sequences in the 2016 LANL alignment. We observed clustering of the  
194 most active guides within the LTR; target sites for gRNAs with GFP knockdown > 30% were  
195 found at positions 74-75, 319-344 and 446 relative to the start of the 5' LTR. Although some

196 active guides appear to coincide with regions of high residue conservation within the LTR (Fig  
197 3C), we found no significant correlation between GFP knockdown and target site prevalence  
198 within all available sequences in Group M (Pearson's  $r = -0.03$ ,  $n = 59$ , 95% CI =  $-0.28-0.23$ ,  
199 Table S1C).

200

## 201 **In silico testing of candidate gRNAs on within-host patient sequences**

202 In order to simulate the application of this gene-editing approach on a diverse within-host virus  
203 population, we used a published dataset of HIV sequences obtained from HIV-infected blood  
204 donors in Brazil [25], focusing on the *pol* gene (because it is the most highly conserved) for 10  
205 patients. We started with our list of all *pol* target sites that we identified above from group and  
206 subtype consensus sequences from 2016 LANL alignments, labelling each target site according  
207 to the consensus sequence it was identified from (300, 317, 304 and 328 target sites from group  
208 M and subtype A-C consensus sequences respectively, 1249 sites total, 897 unique sites).  
209 From this combined list of globally conserved target sites, we determined whether each site was  
210 present in each patient's HIV consensus sequence (Tables S4 and S5) [25]. Across infected  
211 persons, an average of 89.4 group M target sites (i.e. 29.80% of all group M sites identified) and  
212 119.9 subtype B sites (39.44% of all subtype B target sites identified) were found to be also  
213 present within patient consensus sequences (SD 11.14 sites/3.24% and 9.84 sites/3.71%  
214 respectively,  $n = 10$  patients), while subtype A and C sites were identified less frequently (Fig  
215 4A). Since subtype B is highly prevalent in Brazil this was not surprising. Five target sites were  
216 found to be present in all 10 patient consensus sequences (Table S5) and one of these  
217 (GATGGCAGGTGATGATTGTGTGG) was also highly conserved in the global alignment for  
218 subtype B (present in 87.09% of LANL sequences). These five target sites were found to occur  
219 between positions 2294 and 2981 in *pol*. In addition, we identified gRNA target sites directly

220 from the patient's consensus sequence. The number of directly identified sites for each patient  
221 ranged between 276 and 313 (mean = 299.30, SD = 10.83, n = 10). Out of 1712 unique sites  
222 generated from the 10 patients' consensus sequences, 351 were present in our list of globally  
223 conserved sites. Of the remaining sites, 1135 were only present in a single individual and 87  
224 sites were found in more than 5 individuals. With one exception  
225 (GTTTCTTGCCCTGTCTCTGCTGG), every site that was present in more than 5 individuals  
226 was also present in our global list.

227

228 **Fig 4.** (A) Number of previously identified target sites from global consensus sequences of  
229 group M and subtype A-C that were present in each patient's HIV consensus sequence. (B)  
230 Within-host target site conservation for each identified target site using deep-sequence data for  
231 4 patients, summarized using box plots. Black dots indicate outlier target sites (outside 1.5xIQR)  
232 and target sites are grouped and colored according to which consensus sequence they were  
233 identified from (the group- or subtype-level consensus from LANL alignments, or from the  
234 patient's HIV consensus sequence).

235

236 Next we used deep-sequence data from each of these individuals [25] to determine the  
237 degree of conservation of each target site within the patient's virus quasispecies population. In  
238 order to accurately quantify rare target site variants, we identified 4 out of 10 patient datasets  
239 where mean coverage across all identified target sites was above 5000x (Table S2, Fig S2B).  
240 For each of these patients, we determined within-host target site conservation by computing the  
241 percentage of reads in the alignment containing an exact match to the site. Within-host target  
242 site conservation was found to vary dramatically for individual gRNAs and between individual

243 patients, ranging between 5.5% and 95.6% with a mean of 83.5% (SD 14.3%, n = 2298) (Fig  
244 4B).

245 Within-host target site conservation was an average of 3.4% higher for sites identified  
246 from our global list (range of means = 84.7% - 86.5%, n = 4 patients) compared to sites that  
247 were only present in the patient's sequence (mean = 81.6%, n = 4, p = 0.026) but the difference  
248 between groups was not statistically significant (F-test, p = 0.15). Target sites identified from  
249 group M or subtype B consensus sequences tended to be more conserved than sites identified  
250 from the patient sequence, but the differences were not statistically significant (both 3.7%  
251 higher, with p = 0.087 and p = 0.054, respectively). Within-host target site conservation was  
252 nearly identical using group M or subtype B sites (p = 0.98). All p-values were > 0.1 after  
253 multiple test corrections.

254

## 255 **Modelling reservoir depletion with CRISPR-based therapy**

256 We developed a mathematical model to understand the effect of experimentally-controllable  
257 parameters on reservoir depletion with hypothetical weekly dosing of various candidate  
258 CRISPR/Cas9 therapies targeting HIV. The model simulates the decay of the latent reservoir by  
259 including many (up to  $10^4$ ) quasispecies carrying replication-competent DNA. These species are  
260 unevenly abundant, and are assumed to follow a log-normal distribution so that each  
261 quasispecies contains 1-1,000 members. Further, each quasispecies decays in size with a rate  
262 drawn from the distribution of reservoir decay rates (half-life 3-4 years) described previously  
263 [26,27]. In the absence of CRISPR therapy, the model simulates a fluctuating but, on average,  
264 slowly decaying HIV reservoir with varying compositions [28]. The parameters analyzed were  
265 enzyme efficacy ( $\epsilon$ , the probability of successful mutagenic DNA cleavage at the target site) and

266 coverage proportion ( $\rho$ , the proportion of sequences that would respond to enzyme). The  
267 measure of target site conservation is based on our analysis of patient samples.

268 Including CRISPR, our simulations suggest that treatments with gRNAs targeting a  
269 single site will be insufficient to achieve functional cure even at high levels of target site  
270 conservation (99%) and enzyme efficiency (0.99) (Fig 5A, Fig S3). Enzyme efficacy is relatively  
271 unimportant in this case, only affecting the number of treatments needed to remove the  
272 sensitive quasispecies. Once removed, additional treatments provide no additional benefit  
273 because insensitive quasispecies dominate the reservoir (Fig 5B). However, if it is possible to  
274 achieve 100% coverage of all quasispecies through the selection of a multiplexed set of gRNAs  
275 that can be delivered simultaneously, the number of treatments to deplete the reservoir to the  
276 first cure threshold (100-fold decrease [16]) can be achieved in 1-5 treatments depending on  
277 efficacy (Fig 5C), whereas the second threshold ( $10^4$ -fold decrease [15]) requires 10-15  
278 treatments depending on efficacy. For all modeled assumptions, coverage is vital to reservoir  
279 depletion. Whereas suboptimal efficiency can be surmounted by repeated doses, the diversity of  
280 the reservoir provides the largest barrier to depletion.

281

282 **Fig 5.** Reservoir depletion with anti-HIV CRISPR therapy. (A) Three representative examples  
283 showing the impact of proportional target site conservation ( $\rho$ ) and enzyme efficacy ( $\epsilon$ ) to a  
284 single target site. With a single target site, even at high levels of target site conservation (99%)  
285 and a highly efficacious enzyme ( $\epsilon=0.99$ ), reservoir depletion thresholds for functional cure  
286 cannot be met. Black triangles indicate dosing and the dashed line represents a stringent  
287 threshold for latent reservoir reduction where patients are expected to remain suppressed for  
288 years without ART [15]. (B) Simulations with varying CRISPR efficiency and coverage fraction  
289 illustrate that after 3-5 hypothetical treatments, reservoir size depletion is constrained

290 predominantly by coverage fraction. Only when coverage is above 95% does reservoir size  
291 begin to approach the first clinically relevant threshold of  $\sim 10^4$  cells. (C) If 100% coverage of  
292 target sites can be achieved (either through multiplexing of targets or due to a target site that is  
293 highly conserved), enzyme efficacy becomes relevant, dictating the number of doses to cure.  
294 Doses range between 1-5 doses for a median 1 yr remission and 10-15 doses for a potentially  
295 lifelong absence of viral rebound based on previously estimated thresholds.

296

297

## 298 **Discussion**

299 Gene editing using CRISPR/Cas9 has the potential to effect a functional cure for HIV through  
300 targeted mutagenesis or proviral genome excision [29]. This approach has now been  
301 demonstrated in multiple proof-of-concept *in vitro* and *in vivo* studies [7,9–11,20,30–32]. While  
302 laboratory demonstration of gRNA activity has largely relied on clonal populations of lab-  
303 adapted HIV strains, clinical applications of this method will need to consider the wide intra- and  
304 inter-host diversity of HIV. The global diversity of HIV-1 is reflected in the classification of  
305 viruses into four broad groups (M, N, O, and P) that are 25-40% divergent, and within-group  
306 subtypes that are up to 15% divergent [23]. This remarkable global diversity of HIV is the result  
307 of within-host evolution and adaption to immune pressure, and transmission of genetic variants  
308 from the host quasispecies over multiple rounds of viral replication. Target sites chosen for gene  
309 editing will therefore also need to reflect this genetic variability within and between individuals.

310 Globally conserved target sites are good starting points for gRNA design; if their high  
311 frequencies in the population are the result of selection, endonuclease-induced mutations are  
312 more likely to be highly deleterious to the virus. Indeed, it has been shown that highly conserved

313 target sites are associated with improved antiviral activity, and importantly, delayed viral escape  
314 [10,31]. Identification of sites that are conserved at a global or subtype level may also allow for  
315 future deployment of these therapies in situations where obtaining individual patient HIV  
316 sequence data may not be feasible or practical. To this end, we identified gRNA target sites in  
317 HIV LTR that were highly conserved in global consensus sequences and tested the activity of  
318 these guides *in vitro*. Using a separate set of deep-sequence data [25], we showed that sites  
319 identified from our list of globally conserved targets that were present in the patient's sequence  
320 also showed greater within-host conservation.

321         Gene therapy approaches designed to cure an infected individual will need to ensure  
322 that all relevant within-host variants are targeted. Although early initiation of long-term cART has  
323 been shown to reduce the rate of HIV evolution, the virus is still thought to accumulate about  
324 0.97 mutations/kb/year [13,14]. Using a mathematical model, we showed that variants that are  
325 not recognized and cleaved will be the major barrier to achieving functional cure thresholds.  
326 These variants, if replication-competent, have the potential to reactivate upon cART interruption  
327 and reseed the reservoir. Our model makes an assumption about the underlying distribution of  
328 quasispecies abundance, which is not fully understood, but notably, three disparate  
329 assumptions all resulted in similar conclusions. Estimating time to rebound based on reservoir  
330 reduction is challenging and various estimates of thresholds for depletion exist [15,16,33,34]. In  
331 our simulations, we have included estimates for median 1 y and median lifetime remission from  
332 HIV rebound. However, the depletion itself depends on targeting viral quasispecies diversity,  
333 which is not yet fully understood.

334         The efficiency of gene delivery to target cells is another key factor determining  
335 therapeutic outcome. We have also not explicitly incorporated gene delivery in the current  
336 model but instead assumed that it is captured within the cleavage efficiency parameter  $\epsilon$ .  
337 However, we have shown previously [35] that gene delivery of endonucleases using viral

338 vectors is prone to large bottlenecks at the points of vector packaging, viral entry and gene  
339 expression. Optimization of gene delivery is therefore another important step needed for the  
340 clinical success of gene therapies against HIV.

341 HIV has also been shown to rapidly escape endonuclease targeting [10,11,31],  
342 suggesting that therapies will need to target multiple sites concurrently in order to achieve  
343 sustained rebound and prevent the emergence of treatment resistance. Our simulations support  
344 these findings and show that even enzymes with high on-target efficiency will fail to produce a  
345 functional cure if there are target site variants present at frequencies as low as 1%. Two recent  
346 proof-of-principle studies showed that an approach with dual gRNAs targeting multiple genes  
347 can delay or completely prevent viral escape [30,36]. We identified paired and triplet sets of  
348 gRNA target sites that occur in over 98% of the population. Since these sites are likely to also  
349 be highly conserved within-host (as our results suggest), they would be good candidates for  
350 testing *in vitro* for activity. Although our mathematical model takes multiplexed gRNAs into  
351 consideration within the parameter  $\rho$ , it does not explicitly include dynamic emergence of  
352 treatment-resistant variants. Our model framework is amenable to emergent resistance, but was  
353 not included for lack of information on these dynamics. In addition, although many recent  
354 studies have targeted LTR, we have shown that *pol* is a better genomic target for directed  
355 mutagenesis due to target site conservation. As a result, we believe that targeting multiple sites  
356 within *pol* may be a better approach than targeting LTR alone, which generally contains less-  
357 conserved sites.

358 One of the limitations of our within-host analysis is that we do not have detailed  
359 information about the patient cohort [25] such as treatment status, age at HIV diagnosis and  
360 time of cART initiation and interruption, if any. These factors could potentially impact reservoir  
361 diversity. However, the current analysis is primarily aimed at demonstrating the importance and



362 feasibility of designing gRNAs targeting a diverse viral population. Future work needs to address  
363 this in greater detail, possibly incorporating treatment-related variables to select gRNA designs.

364

## 365 **Materials and methods**

### 366 **HIV sequence datasets and pre-processing**

367 For our analysis of global target site conservation, we obtained sequences from the Los Alamos  
368 National Laboratory (LANL) database. For each region of interest (*gag*, *pol*, LTR), we  
369 downloaded pre-made LANL alignments of all available group M sequences (2016 version). We  
370 extracted a majority consensus sequence using Geneious v10 [37] for all sequences in group M  
371 and for each subtype.

372 For within-host analyses of target site conservation, we used deep-sequencing data from  
373 a study of HIV-infected blood donors in Brazil [25]. Raw paired-end reads for each patient were  
374 trimmed to remove adapters and low-quality regions using Trimmomatic v0.32.2 [38] and  
375 mapped using Bowtie2 v0.2 [39] to the consensus sequence deposited by the authors to  
376 Genbank. These pre-processing steps (Fig S2) were performed within the Galaxy software  
377 framework (<https://galaxyproject.org/>).

378

### 379 **gRNA target site analysis**

380 We developed a custom script to identify gRNA target sites for an input sequence given a  
381 specified PAM sequence (default 'NGG' for spCas9) and desired gRNA length  $w$  (default 20 nt).  
382 The algorithm finds all matches to the PAM sequence in the forward and reverse directions and  
383 returns, for each match,  $w$  bases upstream of the PAM sequence. We then used the sgRNA

384 designer from the Broad Institute (<https://portals.broadinstitute.org/gpp/public/analysis->  
385 [tools/sgrna-design](https://portals.broadinstitute.org/gpp/public/analysis-tools/sgrna-design)) to determine predicted on-target efficacy score and off-target scores (threat  
386 matrix) [17]. On-target predicted activity scores are in the range [0,1] with higher values  
387 predicting more active guides and a score of 1 indicating successful knockout in the  
388 experiments in [17] and [40].

389 For each target site identified, we determined the number of exact matches found in an  
390 alignment of the region of interest (LTR, *gag* or *pol*). We excluded all sites with close off-target  
391 matches to the human genome (> 3 matches in Match Bin I, i.e. CFD score = 1 [17]). For each  
392 region, we determined pairs and triplets of gRNAs by starting with the previously identified list of  
393 gRNAs and adding on guides that increase targeting when used in combination.

394 We computed target site conservation in terms of the frequency of occurrence of the  
395 target site (exact matches) within the alignment and also we used a measure of information  
396 content similar to what is used to generate sequence logo plots [41,42]. We applied a moving  
397 window of size 23 (corresponding to the width of gRNA) and computed conservation from the  
398 relative frequencies of bases in the alignment using the method of Schneider et al. [42]  
399 incorporating small-sample correction. The result is a value between 0 and 2 bits with higher  
400 values indicating greater sequence conservation. All analyses were performed in  
401 R/Bioconductor and code is available on GitHub (<http://github.com/proychou/CRISPR>).

402

### 403 **Functional testing of gRNA activity**

404 Starting with the list of target sites identified above in LTR, we selected gRNAs from a pool of  
405 the top 20 most conserved sites across group M overall, the top 10 most conserved sites in  
406 each subtype and the top 20 pairs and triplets. As recommended by sgRNA designer, we  
407 excluded any gRNAs with on-target activity scores < 0.2.

408 We developed 4 LTR-GFP fusion reporter constructs using consensus sequences for all  
409 group M, subtype A, subtype B and subtype C (further details in supplement). Internal start  
410 codons and stop codons were identified within the sequence for each consensus LTR and the  
411 reading frame with the fewest combined number of start codons and stop codons was identified.  
412 Reading frame 1 for group M contained 5 start and 4 stop codons, reading frame 1 for subtype  
413 A contained 3 start and 6 stop codons, reading frame 1 for subtype B contained 3 start and 6  
414 stop codons, and reading frame 1 for subtype C contained 3 start and 5 stop codons. All the  
415 internal start and stop codons were modified for each consensus LTR sequence as follows;  
416 ATG to GTG - M to V; TGA to GGA - Stop to G; TAG to GAG - Stop to E; TAA to GAA - Stop to  
417 E, so that one continuous open reading frame was generated. Each of the 4 modified  
418 consensus LTR sequences was then synthesized as a gBlock and cloned into a reporter  
419 plasmid vector (cloning details available upon request) as a fusion to the 5' end of the eGFP  
420 ORF so that the MND promoter drove expression of a single continuous ORF (See Fig S1A for  
421 amino acid sequences). The majority of the 59 gRNA target sites identified for analysis within  
422 the group M, subtype A, subtype B and subtype C consensus LTRs were not changed by start  
423 or stop codon modification, with the exception of overlapping gRNA targets 1 and 2, and  
424 overlapping gRNA targets 18 and 19. A separate reporter construct was generated for gRNAs 1,  
425 2, 18 and 19 by fusing their target sequences to the 5' end of the eGFP ORF so that the MND  
426 promoter also drove expression of a single continuous ORF (cloning details available upon  
427 request).

428 Of the 59 LTR-specific gRNA target sites we elected to screen for activity, 23 were  
429 present in the group M reporter, 27 were present in the group A reporter, 20 were present in the  
430 group B reporter, 18 were present in the group C reporter, and gRNAs 1, 2, 18 and 19 were not  
431 present in any LTR-reporter. Three of the gRNA targets were present in all 4 LTR-reporter  
432 constructs, 8 were present in 3 LTR-reporter constructs, and 8 were present in 2 LTR-reporter

433 constructs. To screen the activity of individual LTR-specific gRNAs they were cloned into the  
434 BbsI site of the plasmid pU6-(Bbs1) CBh-Cas9-T2A-mCherry (a gift from Ralf Kuehn; Addgene  
435 plasmid# 64324) under the control of the U6 promoter. This plasmid expresses spCas9 and  
436 mCherry from the constitutive CBh promoter. Internal positive controls for GFP knockdown were  
437 used by also cloning gRNAs eGFP1 and eGFP2 targeting the sequences  
438 CAACTACAAGACCCGCGCCG and GTGAACCGCATCGAGCTGAA into pU6-(Bbs1) CBh-  
439 Cas9-T2A-mCherry. To assay gRNA activity  $2 \times 10^5$  293 cells were plated in 12-well plates and  
440 the following day individual wells were transfected by PEI transfection with 1000ng of a  
441 Cas9/LTR-gRNA expressing plasmid and 250ng of its corresponding LTR-reporter plasmid. At  
442 24 hours post transfection flow cytometry was performed and GFP fluorescence was analyzed  
443 in Cas9 expressing (mCherry positive) 293 cells to determine the level of GFP knockdown  
444 provided by each gRNA.

445

#### 446 **Analysis of flow cytometry data**

447 Raw fcs files were gated using functions from the OpenCyto framework in R/Bioconductor [43]  
448 as described previously [35]. Flow data has been uploaded to flowrepository and code is  
449 available at <http://github.com/proychou/CRISPR>.

450

#### 451 **Intra-host target site conservation**

452 Focusing on the *pol* gene, we identified spCas9 gRNA target sites within the HIV consensus  
453 sequence for each patient using the script described above, excluding any sites containing  
454 degenerate bases. We also determined which of the target sites we had previously identified  
455 from group- and subtype-level consensus sequences for *pol* were present in the patient

456 consensus sequence. Using the average number of reads overlapping all identified target sites,  
457 we excluded any patients with <5000x target site depth since we were interested in variants that  
458 may escape targeting by candidate gRNAs. For each target site, we determined the number of  
459 reads in the alignment containing an exact match to the target site and excluded any sites  
460 where coverage was less than 5000x. We then used the total number of reads that completely  
461 overlap the target site to calculate the percentage of exact target site matches.

462

### 463 **Statistical analysis of within-host conservation**

464 To test whether there were differences in target site conservation measured by mean  
465 percentages of exact target site matches per total reads, a linear mixed model was fit with  
466 percentage as the outcome and the consensus sequence group (group M, subtypes A-C, and  
467 patient) as the predictors. A random intercept for each subject by consensus group was used to  
468 account for within subject and group variation across the repeated outcomes. An overall test  
469 was performed from ANOVA for mixed models using the lmerTest package in R [44]. Post-hoc  
470 pairwise tests were also performed comparing the patient-derived sequences, group M, and  
471 subtype B (the circulating strain in the patient population). To compare the conservation using  
472 patient target sites to the consensus groups, we pooled group M and subtypes A-C into a single  
473 group for comparison in the model, while the random effects specification remained the same.  
474 P-values corrected for multiple testing were also reported using the Holm method [45].

475

### 476 **Mathematical model of reservoir depletion**

477 We have used a mathematical model of the exponential clearance of the HIV reservoir on  
478 consistent ART previously [28]. We extended that model to consider joint treatment with ART

479 and CRISPR gene therapy. Here, the reservoir was modeled as a multi-strain system. For each  
480 strain, a clearance rate was chosen from the available data ranges [27] such that the half-life of  
481 latently infected cells is normally distributed (indicated by notation  $\mathcal{N}$ ) with mean and standard  
482 deviation of 3.6 and 1.5 years respectively, or  $t_{\{1/2\}} \sim \mathcal{N}(3.6, 1.5)$ . We calculate the clearance  
483 rate (per day) for each strain then as  $\theta_s = \ln(2) * 365 / t_{\{1/2\}}$ . We denote the initial number of  
484 latent cells of each strain as  $L_s(0)$  where the initial number of cells infected by strain  $s$  is drawn  
485 from a log-normal distribution with average value  $\mu$  and standard deviation  $\sigma = \mu/10$  so that  
486 each strain has size  $\log L_s(0) \sim \mathcal{N}(\mu, \sigma)$ . Then, we denote the total number of strains  $\mathcal{S}$  such that  
487  $\sum_{s=1}^{\mathcal{S}} L_s(0) \sim 1$  million cells [46,47] and we consider latent reservoirs that begin with average  
488 strain sizes  $\mu = 10^3, 10^4$ , and  $10^5$ , which means that there are  $\mathcal{S} \approx 10^6/\mu$  strains, respectively.  
489 Then, the model for the size of the reservoir in an individual on suppressive ART undergoing  
490 CRISPR treatment is  $L(t) = \sum_s L_s(0) \exp(\theta_s t) \eta_s(t)$ .

491 The CRISPR therapy affects some proportion  $\rho$  of the strains and has efficiency  $\epsilon$ . The  
492 impact of CRISPR on each strain over time is described by  $\eta_s(t)$ . For convenience, we model  
493 the therapy as a weekly dosage, but can be easily adjusted. Thus, the CRISPR effect is defined  
494 mathematically as  $\eta_s(t) = \begin{cases} \epsilon, & \{t \bmod 7\} = 0, s > \rho\mathcal{S} \\ 0, & \text{else} \end{cases}$ . We do not consider the impact of delivery,  
495 which was previously described in [35].

496 The model is simulated using a hybrid stochastic simulation algorithm [48]. When the  
497 number of cells in a quasispecies is large ( $L_s(t) > 100$ ), we use the  $\tau$ -leap method [49], and  
498 once  $L_s(t) \leq 100$  the simulation proceeds with a direct stochastic “Gillespie” algorithm [50].

## 499 **References**

- 500 1. Richman DD, Margolis DM, Delaney M, Greene WC, Hazuda D, Pomerantz RJ. The  
501 challenge of finding a cure for HIV infection. *Science* (80- ). 2009;323: 1304–1307.  
502 doi:10.1126/science.1165706
- 503 2. Chomont N, El-Far M, Ancuta P, Trautmann L, Procopio FA, Yassine-Diab B, et al. HIV  
504 reservoir size and persistence are driven by T cell survival and homeostatic proliferation.  
505 *Nat Med*. 2009;15: 893–900. doi:10.1038/nm.1972
- 506 3. Soriano-Sarabia N, Archin NM, Bateson R, Dahl NP, Crooks AM, Kuruc JAD, et al.  
507 Peripheral V $\gamma$ 9V $\delta$ 2 T Cells Are a Novel Reservoir of Latent HIV Infection. *PLoS Pathog*.  
508 2015;11. doi:10.1371/journal.ppat.1005201
- 509 4. Sarkar I, Hauber I, Hauber J, Buchholz F. HIV-1 Proviral DNA Excision Using an Evolved  
510 Recombinase. *Science* (80- ). 2007;316: 1912–1915. doi:10.1126/science.1141453
- 511 5. Mariyanna L, Priyadarshini P, Hofmann-Sieber H, Krepstakies M, Walz N, Grundhoff A, et  
512 al. Excision of HIV-1 proviral DNA by recombinant cell permeable tre-recombinase. *PLoS*  
513 *One*. 2012;7. doi:10.1371/journal.pone.0031576
- 514 6. Qu X, Wang P, Ding D, Li L, Wang H, Ma L, et al. Zinc-finger-nucleases mediate specific  
515 and efficient excision of HIV-1 proviral DNA from infected and latently infected human T  
516 cells. *Nucleic Acids Res*. 2013;41: 7771–7782. doi:10.1093/nar/gkt571
- 517 7. Ebina H, Misawa N, Kanemura Y, Koyanagi Y. Harnessing the CRISPR/Cas9 system to  
518 disrupt latent HIV-1 provirus. *Sci Rep*. 2013;3: 2510. doi:10.1038/srep02510
- 519 8. Hu W, Kaminski R, Yang F, Zhang Y, Cosentino L, Li F, et al. RNA-directed gene editing  
520 specifically eradicates latent and prevents new HIV-1 infection. *Proc Natl Acad Sci U S A*.

- 521 2014;111: 11461–11466. doi:10.1073/pnas.1405186111
- 522 9. Zhu W, Lei R, Le Duff Y, Li J, Guo F, Wainberg MA, et al. The CRISPR/Cas9 system  
523 inactivates latent HIV-1 proviral DNA. *Retrovirology*. 2015;12: 22. doi:10.1186/s12977-  
524 015-0150-z
- 525 10. Wang Z, Pan Q, Gendron P, Zhu W, Guo F, Cen S, et al. CRISPR/Cas9-Derived  
526 Mutations Both Inhibit HIV-1 Replication and Accelerate Viral Escape. *Cell Rep*. 2016;15:  
527 481–489. doi:10.1016/j.celrep.2016.03.042
- 528 11. De Silva Felixge HS, Stone D, Pietz HL, Roychoudhury P, Greninger AL, Schiffer JT, et  
529 al. Detection of treatment-resistant infectious HIV after genome-directed antiviral  
530 endonuclease therapy. *Antiviral Res*. 2016;126: 90–98.  
531 doi:10.1016/j.antiviral.2015.12.007
- 532 12. Wang G, Zhao N, Berkhout B, Das AT. A Combinatorial CRISPR-Cas9 Attack on HIV-1  
533 DNA Extinguishes All Infectious Provirus in Infected T Cell Cultures. *Cell Rep*. 2016;17:  
534 2819–2826. doi:10.1016/j.celrep.2016.11.057
- 535 13. Josefsson L, von Stockenström S, Faria NR, Sinclair E, Bacchetti P, Killian M, et al. The  
536 HIV-1 reservoir in eight patients on long-term suppressive antiretroviral therapy is stable  
537 with few genetic changes over time. *Proc Natl Acad Sci*. 2013;110: E4987–E4996.  
538 doi:10.1073/pnas.1308313110
- 539 14. Dampier W, Nonnemacher MR, Mell J, Earl J, Ehrlich GD, Pirrone V, et al. HIV-1 genetic  
540 variation resulting in the development of new quasispecies continues to be encountered  
541 in the peripheral blood of well-suppressed patients. *PLoS One*. 2016;11.  
542 doi:10.1371/journal.pone.0155382
- 543 15. Hill AL, Rosenbloom DI, Fu F, Nowak MA, Siliciano RF. Predicting the outcomes of



- 544 treatment to eradicate the latent reservoir for HIV-1. *Proc Natl Acad Sci U S A*. 2014;111:  
545 13475–13480. doi:10.1073/pnas.1406663111
- 546 16. Pinkevych M, Cromer D, Tolstrup M, Grimm AJ, Cooper DA, Lewin SR, et al. HIV  
547 Reactivation from Latency after Treatment Interruption Occurs on Average Every 5-8  
548 Days--Implications for HIV Remission. *PLoS Pathog*. 2015;11: e1005000.  
549 doi:10.1371/journal.ppat.1005000
- 550 17. Doench JG, Fusi N, Sullender M, Hegde M, Vaimberg EW, Donovan KF, et al. Optimized  
551 sgRNA design to maximize activity and minimize off-target effects of CRISPR-Cas9. *Nat*  
552 *Biotechnol*. Nature Publishing Group; 2016;34: 184–91. doi:10.1038/nbt.3437
- 553 18. Xie S, Shen B, Zhang C, Huang X, Zhang Y. sgRNAs9: a software package for  
554 designing CRISPR sgRNA and evaluating potential off-target cleavage sites. Khodursky  
555 AB, editor. *PLoS One*. 2014;9: e100448. doi:10.1371/journal.pone.0100448
- 556 19. Zhu LJ. Overview of guide RNA design tools for CRISPR-Cas9 genome editing  
557 technology. *Front Biol (Beijing)*. 2015;10: 289–296. doi:10.1007/s11515-015-1366-y
- 558 20. Kaminski R, Bella R, Yin C, Otte J, Ferrante P, Gendelman HE, et al. Excision of HIV-1  
559 DNA by gene editing: a proof-of-concept in vivo study. *Gene Ther*. 2016; 1–6.  
560 doi:10.1038/gt.2016.41
- 561 21. Yin C, Zhang T, Li F, Yang F, Putatunda R, Young W-B, et al. Functional screening of  
562 guide RNAs targeting the regulatory and structural HIV-1 viral genome for a cure of AIDS.  
563 *AIDS*. 2016;30: 1163–74. doi:10.1097/QAD.0000000000001079
- 564 22. Hu W, Kaminski R, Yang F, Zhang Y, Cosentino L, Li F, et al. RNA-directed gene editing  
565 specifically eradicates latent and prevents new HIV-1 infection. *Proc Natl Acad Sci*.  
566 2014;111: 11461–11466. doi:10.1073/pnas.1405186111

- 567 23. Li G, Piampongsant S, Faria NR, Voet A, Pineda-Peña A-C, Khouri R, et al. An integrated  
568 map of HIV genome-wide variation from a population perspective. *Retrovirology*. 2015;12:  
569 18. doi:10.1186/s12977-015-0148-6
- 570 24. Doench JG, Hartenian E, Graham DB, Tothova Z, Hegde M, Smith I, et al. Rational  
571 design of highly active sgRNAs for CRISPR-Cas9-mediated gene inactivation. *Nat*  
572 *Biotechnol*. Nature Publishing Group; 2014;32: 1262–1267. doi:10.1038/nbt.3026
- 573 25. Pessôa R, Loureiro P, Esther Lopes M, Carneiro-Proietti ABF, Sabino EC, Busch MP, et  
574 al. Ultra-Deep Sequencing of HIV-1 near Full-Length and Partial Proviral Genomes  
575 Reveals High Genetic Diversity among Brazilian Blood Donors. Kaderali L, editor. *PLoS*  
576 *One*. 2016;11: e0152499. doi:10.1371/journal.pone.0152499
- 577 26. Siliciano JD, Kajdas J, Finzi D, Quinn TC, Chadwick K, Margolick JB, et al. Long-term  
578 follow-up studies confirm the stability of the latent reservoir for HIV-1 in resting CD4+ T  
579 cells. *Nat Med*. 2003;9: 727–728. doi:10.1038/nm880
- 580 27. Crooks AM, Bateson R, Cope AB, Dahl NP, Griggs MK, Kuruc JAD, et al. Precise  
581 quantitation of the latent HIV-1 reservoir: Implications for eradication strategies. *J Infect*  
582 *Dis*. 2015;212: 1361–1365. doi:10.1093/infdis/jiv218
- 583 28. Reeves DB, Duke ER, Hughes SM, Prlic M, Hladik F, Schiffer JT. Anti-proliferative  
584 therapy for HIV cure: a compound interest approach. *Sci Rep*. 2017;7: 4011.  
585 doi:10.1038/s41598-017-04160-3
- 586 29. Spragg C, De Silva Felixge H, Jerome KR. Cell and gene therapy strategies to eradicate  
587 HIV reservoirs. *Curr Opin HIV AIDS*. 2016;11: 442–9.  
588 doi:10.1097/COH.0000000000000284
- 589 30. Wang G, Zhao N, Berkhout B, Das AT. A Combinatorial CRISPR-Cas9 Attack on HIV-1

- 590 DNA Extinguishes All Infectious Provirus in Infected T Cell Cultures. *Cell Rep.* 2016;17:  
591 2819–2826. doi:10.1016/j.celrep.2016.11.057
- 592 31. Wang G, Zhao N, Berkhout B, Das AT. CRISPR-Cas9 Can Inhibit HIV-1 Replication but  
593 NHEJ Repair Facilitates Virus Escape. *Mol Ther.* 2016;24: 522–526.  
594 doi:10.1038/mt.2016.24
- 595 32. Kaminski R, Chen Y, Fischer T, Tedaldi E, Napoli A, Zhang Y, et al. Elimination of HIV-1  
596 Genomes from Human T-lymphoid Cells by CRISPR/Cas9 Gene Editing. *Sci Rep.* 2016;  
597 doi:10.1038/srep22555
- 598 33. Pinkevych M, Kent SJ, Tolstrup M, Lewin SR, Cooper DA, Søggaard OS, et al. Modeling of  
599 Experimental Data Supports HIV Reactivation from Latency after Treatment Interruption  
600 on Average Once Every 5–8 Days. Swanstrom R, editor. *PLOS Pathog.* 2016;12:  
601 e1005740. doi:10.1371/journal.ppat.1005740
- 602 34. Hill AL, Rosenbloom DIS, Siliciano JD, Siliciano RF. Insufficient Evidence for Rare  
603 Activation of Latent HIV in the Absence of Reservoir-Reducing Interventions. Swanstrom  
604 R, editor. *PLOS Pathog.* 2016;12: e1005679. doi:10.1371/journal.ppat.1005679
- 605 35. Roychoudhury P, De Silva Felixge HS, Pietz HL, Stone D, Jerome KR, Schiffer JT.  
606 Pharmacodynamics of anti-HIV gene therapy using viral vectors and targeted  
607 endonucleases. *J Antimicrob Chemother.* 2016; dkw104. doi:10.1093/jac/dkw104
- 608 36. Lebbink RJ, De Jong DCM, Wolters F, Kruse EM, Van Ham PM, Wiertz EJHJ, et al. A  
609 combinational CRISPR/Cas9 gene-editing approach can halt HIV replication and prevent  
610 viral escape. *Sci Rep.* Nature Publishing Group; 2017;7: 1–10. doi:10.1038/srep41968
- 611 37. Kearse M, Moir R, Wilson A, Stones-Havas S, Cheung M, Sturrock S, et al. Geneious  
612 Basic: An integrated and extendable desktop software platform for the organization and

- 613 analysis of sequence data. *Bioinformatics*. 2012;28: 1647–1649.  
614 doi:10.1093/bioinformatics/bts199
- 615 38. Bolger AM, Lohse M, Usadel B. Trimmomatic: a flexible trimmer for Illumina sequence  
616 data. *Bioinformatics*. 2014;30: 2114–2120. doi:10.1093/bioinformatics/btu170
- 617 39. Langmead B, Salzberg SL. Fast gapped-read alignment with Bowtie 2. *Nat Methods*.  
618 2012;9: 357–359. doi:10.1038/nmeth.1923
- 619 40. Doench JG, Hartenian E, Graham DB, Tothova Z, Hegde M, Smith I, et al. Rational  
620 design of highly active sgRNAs for CRISPR-Cas9-mediated gene inactivation. *Nat*  
621 *Biotechnol*. Nature Publishing Group; 2014;32: 1262–1267. doi:10.1038/nbt.3026
- 622 41. Crooks GE. WebLogo: A Sequence Logo Generator. *Genome Res*. 2004;14: 1188–1190.  
623 doi:10.1101/gr.849004
- 624 42. Schneider TD, Stormo GD, Gold L, Ehrenfeucht A. Information content of binding sites on  
625 nucleotide sequences. *J Mol Biol*. 1986;188: 415–431. doi:10.1016/0022-2836(86)90165-  
626 8
- 627 43. Finak G, Frelinger J, Jiang W, Newell EW, Ramey J, Davis MM, et al. OpenCyto: an open  
628 source infrastructure for scalable, robust, reproducible, and automated, end-to-end flow  
629 cytometry data analysis. *PLoS Comput Biol*. 2014;10: e1003806.  
630 doi:10.1371/journal.pcbi.1003806
- 631 44. Kuznetsova A, Brockhoff PB, Christensen RHB. lmerTest Package: Tests in Linear Mixed  
632 Effects Models. *J Stat Softw*. 2017;82. doi:10.18637/jss.v082.i13
- 633 45. Holm S. A Simple Sequentially Rejective Multiple Test Procedure. *Scand J Stat*. 1979;6:  
634 65–70. doi:10.2307/4615733

- 635 46. Hosmane NN, Kwon KJ, Bruner KM, Capoferri AA, Beg S, Rosenbloom DIS, et al.  
636 Proliferation of latently infected CD4+ T cells carrying replication-competent HIV-1:  
637 Potential role in latent reservoir dynamics. *J Exp Med.* 2017;214: 959–972.  
638 doi:10.1084/jem.20170193
- 639 47. Ho Y-C, Shan L, Hosmane NN, Wang J, Laskey SB, Rosenbloom DIS, et al. Replication-  
640 competent noninduced proviruses in the latent reservoir increase barrier to HIV-1 cure.  
641 *Cell.* Elsevier Inc.; 2013;155: 540–51. doi:10.1016/j.cell.2013.09.020
- 642 48. Kalantzis G. Hybrid stochastic simulations of intracellular reaction-diffusion systems.  
643 *Comput Biol Chem.* 2009;33: 205–15. doi:10.1016/j.compbiolchem.2009.03.002
- 644 49. Gillespie DT. Approximate accelerated stochastic simulation of chemically reacting  
645 systems. *J Chem Phys.* 2001;115: 1716–1733. doi:10.1063/1.1378322
- 646 50. Gillespie DT. Exact stochastic simulation of coupled chemical reactions. *J Phys Chem.*  
647 1977;81: 2340–2361. doi:10.1021/j100540a008

648

649

650

## 651 **Supporting Information**

652 **Fig S1.** (A) gRNAs were selected for functional testing based on the number of sequences  
653 targeted in a global group- or subtype-level alignment either singly, in pairs or triplets (B) Amino  
654 acid sequence for the N-terminus of each LTR-reporter GFP fusion construct. M group, subtype  
655 A, subtype B, and subtype C reporter amino acid sequences are aligned for each of the 4  
656 reporter constructs. The sequence for eGFP begins with the sequence VSKGEELFT. (C)

657 Transfection efficiency shown in terms of percentage of mCherry+ cells in each treatment. (D)

658 Absolute numbers of mCherry+GFP+ cells in each treatment.

659

660 **Fig S2.** (A) Flowchart showing processing steps for intrahost deep sequence data. (B) Target

661 site depth based on number of reads overlapping the target site in an alignment for 4 patients

662 with deep sequence data. Black dots indicate outlier target sites (outside 1.5xIQR) and target

663 sites are grouped and colored according to which consensus sequence they were identified

664 from (the group- or subtype-level consensus from LANL alignments, or from the patient's HIV

665 consensus sequence).

666

667 **Fig S3.** (A) 3 hypothetical distributions of quasispecies abundance in the HIV reservoir. In each

668 case the total size of the reservoir (number of infected cells) is the same ( $L = 10^6$ ), but the

669 average number of cells in a quasispecies, or "log10 clone size", is  $\mu = 10^3, 10^4, 10^5$

670 respectively. The quasispecies abundances are drawn from a log-normal distribution with

671 variance  $\mu/10$  in each case. The distribution applies to the simulations in (B) in the same row.

672 (B) Simulations of reservoir decays assuming suppressive ART and hypothetical CRISPR

673 treatment of efficacy  $\epsilon$  and coverage  $\rho$ . The colored lines indicate quasispecies  $L_s(t)$ , and the

674 solid line shows the total reservoir size  $L(t)$ . The dashed line represents a conservative HIV

675 cure threshold taken from the literature. While many quasispecies are removed, the insensitive

676 variants persist and represent a large enough reservoir to prevent cure in all cases.

677

678 **Table S1.** (A) Correlation between predicted activity and target site conservation (B) Correlation  
679 between measured and predicted activity (C) Correlation between measured activity and target  
680 site prevalence

681

682 **Table S2.** List of highly conserved, subtype-specific triplet/paired gRNAs

683

684 **Table S3.** GFP knockdown with candidate guides tested using fluorescent reporter

685

686 **Table S4.** Sequences used in intrahost analysis

687

688 **Table S5.** Guides from globally conserved list (using LANL sequences) that have matches in  
689 patient sequence

690

691 **File S1.** Supplementary methods: LTR reporter design

692

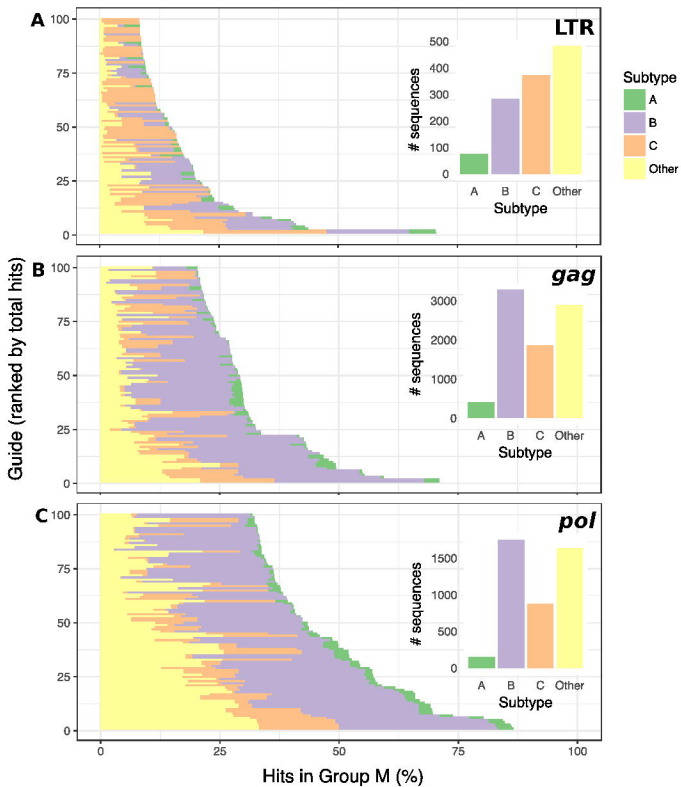



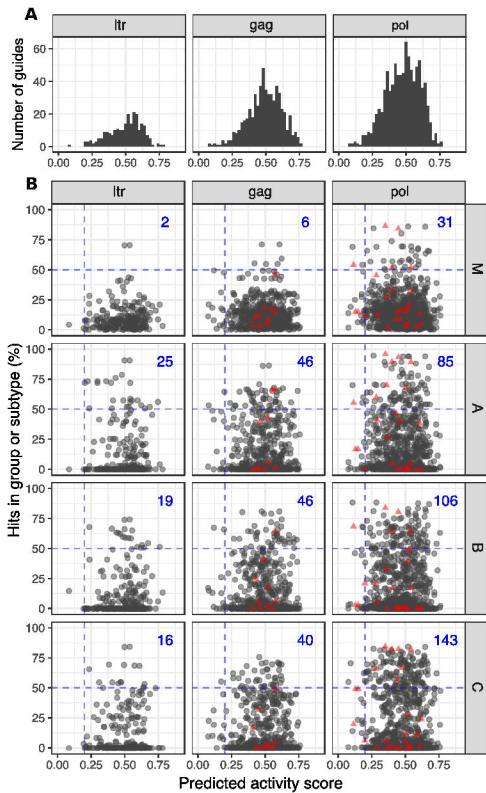

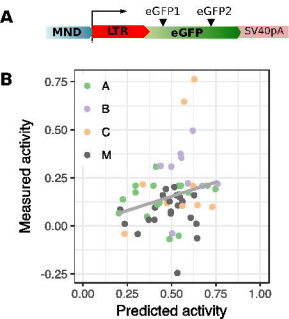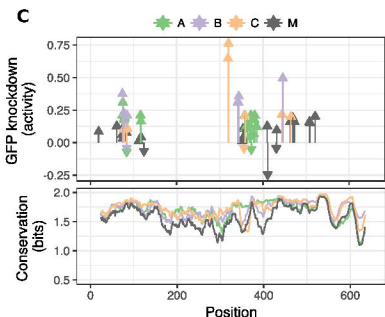

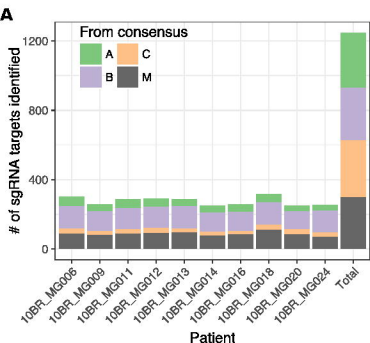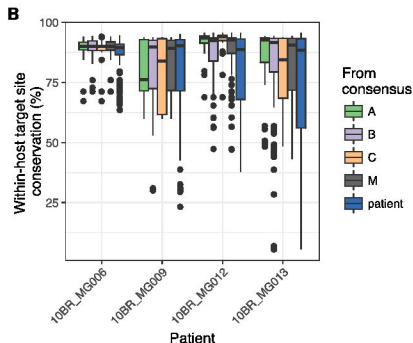

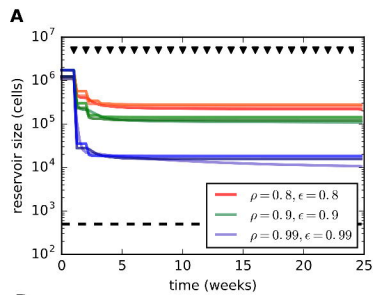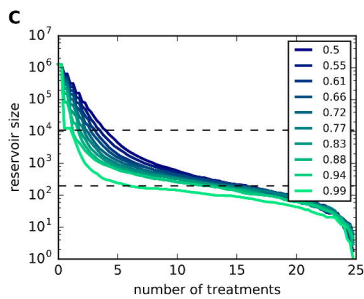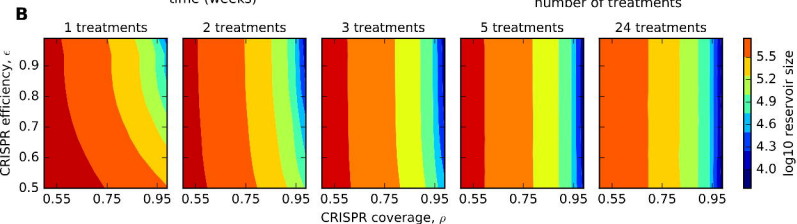

Source: http://biorxiv.org/content/10.1101/255133v1.full.pdf
